# Supplementary material for: Methods to Calculate the Heat Index as an Exposure Metric in Environmental Health Research
Source: PubMed Central journal article supplement (PMC3801457; doi:10.1289/ehp.1206273), 2013-08-09
Supplement: ehp.1206273.s001.pdf [file ehp.1206273.s001.pdf]

**Supplemental Material**  
**Methods to Calculate the Heat Index as an Exposure Metric in  
Environmental Health Research**

G. Brooke Anderson, Michelle L. Bell, and Roger D. Peng

Table S1. Identifications of weather stations providing weather data for each of the 50 US state capitals for 2011.

| State          | Capital city   | Weather station |
|----------------|----------------|-----------------|
| Alabama        | Montgomery     | KMXF            |
| Alaska         | Juneau         | PAJN            |
| Arizona        | Phoenix        | KPHX            |
| Arkansas       | Little Rock    | KJKL            |
| California     | Sacramento     | KSAC            |
| Colorado       | Denver         | KAPA            |
| Connecticut    | Hartford       | KHFD            |
| Delaware       | Dover          | KDOV            |
| Florida        | Tallahassee    | KTLH            |
| Georgia        | Atlanta        | KPDK            |
| Hawaii         | Honolulu       | PHNL            |
| Idaho          | Boise          | KBOI            |
| Illinois       | Springfield    | KSPI            |
| Indiana        | Indianapolis   | KIND            |
| Iowa           | Des Moines     | KDSM            |
| Kansas         | Topeka         | KTOP            |
| Kentucky       | Frankfort      | KFFT            |
| Louisiana      | Baton Rouge    | KBTR            |
| Maine          | Augusta        | KAUG            |
| Maryland       | Annapolis      | KNAK            |
| Massachusetts  | Boston         | KBOS            |
| Michigan       | Lansing        | KLAN            |
| Minnesota      | Saint Paul     | KSTP            |
| Mississippi    | Jackson        | KHKS            |
| Missouri       | Jefferson City | KJEF            |
| Montana        | Helena         | KHLN            |
| Nebraska       | Lincoln        | KLNK            |
| Nevada         | Carson City    | KRNO            |
| New Hampshire  | Concord        | KCON            |
| New Jersey     | Trenton        | KTTN            |
| New Mexico     | Santa Fe       | KSAF            |
| New York       | Albany         | KALB            |
| North Carolina | Raleigh        | KRDU            |
| North Dakota   | Bismarck       | KBIS            |
| Ohio           | Columbus       | KOSU            |
| Oklahoma       | Oklahoma City  | KPWA            |
| Oregon         | Salem          | KSLE            |
| Pennsylvania   | Harrisburg     | KMDT            |
| Rhode Island   | Providence     | KPVD            |
| South Carolina | Columbia       | KCUB            |
| South Dakota   | Pierre         | KPIR            |
| Tennessee      | Nashville      | KBNA            |

| State         | Capital city   | Weather station |
|---------------|----------------|-----------------|
| Texas         | Austin         | KATT            |
| Utah          | Salt Lake City | KSLC            |
| Vermont       | Montpelier     | KMPV            |
| Virginia      | Richmond       | KRIC            |
| Washington    | Olympia        | KOLM            |
| West Virginia | Charleston     | KCRW            |
| Wisconsin     | Madison        | KC29            |
| Wyoming       | Cheyenne       | KCYS            |
